1 **Title: Attitude of reproductive age women towards male involvement in family planning;**  
2 **a community-based cross-sectional study in Nakawa Division, Kampala, Uganda.**

3 **Running Title: Attitude of reproductive age women towards male involvement in family**  
4 **planning.**

5 Sarah Namee Wambete,<sup>1,2</sup>Ararso Baru,<sup>3,4</sup> Dorcas Serwaa,<sup>5\*</sup> Edem Kojo Dzantor,<sup>6</sup> Evelyn  
6 Poku-Agyemang,<sup>5</sup> Margaret Wekem Kukeba,<sup>7</sup> Oladapo O. Olayemi<sup>8</sup>

7 <sup>1</sup>Save The Mothers East Africa, Uganda Christian University, Faculty of Public Health, Nursing  
8 and Midwifery, Department of Public Health, Mukono, Uganda

9 <sup>2</sup>Slum and Rural Health Initiative Network/Uganda, Kampala, Uganda.

10 <sup>3</sup>College of Medicine and Health Sciences, Arbaminch University, Arbaminch, Ethiopia

11 <sup>4</sup>Slum and Rural Health Initiative Network/Ethiopia, Addis Ababa, Ethiopia.

12 <sup>5</sup>Department of Nursing and Midwifery, Methodist Health Training Institute, Afosu, Eastern  
13 Region, Ghana

14 <sup>6</sup>Department of Epidemiology, Fred N. Binka School of Public Health, University of Health  
15 and Allied Sciences, Hohoe Campus, Ghana

16 <sup>7</sup>Department of Nursing, School of Nursing and Midwifery, CKT-University of Technology  
17 and Applied Sciences, Navrongo, Upper-East Region, Ghana

18 <sup>8</sup>Department of Obstetrics and Gynecology, Faculty of Clinical Medicine, College of Medicine,  
19 University of Ibadan, Ibadan, Nigeria.

20

21 **Corresponding Author:**

22 [dserwaa0327@stu.ui.edu.ng](mailto:dserwaa0327@stu.ui.edu.ng)(DS)

## 23 **Abstract**

24 **Background:** In African countries, men are often the primary decision-makers and that have a  
25 significant influence on their spouse's health and access to health care including family  
26 planning (FP) decisions. This study aimed to assess the attitude of women in Nakawa Division,  
27 Kampala, Uganda towards male involvement in FP and the associated factors.

28 **Methods:** This was a community-based cross-sectional study carried out in Nakawa Division,  
29 Kampala, Uganda. A total of 480 women aged 18-49 years were selected as participants for the  
30 study using multi-stage sampling. A semi-structured interviewer-administered questionnaire  
31 was used to collect information from the participants. The data collected was analyzed using  
32 SPSS version 22. Data were described using frequency and percentage while associations were  
33 assessed using logistic regression analysis at  $P < 0.05$ .

34 **Results:** A total of 485 participants with mean age of  $28.29 \pm 6.57$  years were involved in this  
35 study; 197(41.0%) were aged 26-33 years, 399 (83.1%) were Christians, 240(50.0%) had  
36 attained secondary school education and 239(49.8%) of their partners had attained tertiary  
37 education. The most utilized contraceptives among the women were injectables 151(32.5%),  
38 pills 122(26.2%), condoms 76(16.3%), implants 37(8%) and calendar method 30(6.5%). More,  
39 302/465(62.9%) of the women had adequate partner involvement in their FP and a total of  
40 438/480 (91.3%) of the participants had favorable attitude of women toward male involvement  
41 in FP. After adjusting for confounders, participants with an average monthly income of  
42 600,000/= and above were more likely to have favorable attitude towards male involvement in  
43 FP (AOR=10.51, 95% CI {1.19–93.25},  $p=0.035$ ) compared with those earning 0-100,000/=  
44 average monthly income per month. Also, participants with adequate male partner involvement

45 in FP/contraceptive use were more likely to have favorable attitude towards male involvement  
46 in FP (AOR=2.78, 95% CI {1.23–6.30, p<0.014)

47 **Conclusion:** The study found high favourable attitude of women towards male partner  
48 involvement at FP. The average monthly income of participants and male involvement were  
49 predictors of favourable attitude towards male involvement in FP. This finding indicates the  
50 need for increased sensitization of the men as a means of attaining the broader objective of  
51 increasing male partner involvement in FP for better contraceptive use and better birth spacing.

52

53 **Keywords:** Male Involvement, Perception, Attitude, Family planning, Shared Decision  
54 Making.

## 55 Introduction

56 In Uganda, the total fertility rate (TFR) stands at 5.4 children per woman with those in  
57 rural areas more likely to have more children than their counterparts in urban areas [1]. Over  
58 the years, between 2011 and 2015, the Uganda national contraceptive prevalence rate (CPR)  
59 has gone from 24% to 39% and the use of modern contraception is higher among women in  
60 urban areas (41%) than those in rural areas (33%) [1]. The progress is still very poor and slow  
61 and the figures are still quite alarming [1, 2]. An array of circumstances may influence women's  
62 decision to use FP methods including knowledge, attitude, accessibility and affordability to  
63 health facilities/family planning clinics [3, 4]. Regardless, the role of men in FP uptake cannot  
64 be underestimated as studies have shown that, marriage and cohabitation harm modern  
65 contraceptive use [5–7].

66 It is a common knowledge that FP is regarded as a woman's "thing" in most African  
67 countries. However, in the African setting, men play an important role in family decision-  
68 making and the health seeking behaviour of the family including the uptake of available FP  
69 services [8]. Studies continue to demonstrate the importance of men in reproductive health  
70 decisions and improvement in the utilization of FP services in both women and men [9, 10].  
71 Previous studies have shown that, FP programs that target couples have proved to be more  
72 effective than those directed to individuals either male or female [9, 11]. With men's significant  
73 influence in family and health related seeking behaviours and FP service uptake especially  
74 among women; the important question to ask is how are women feeling about male's  
75 involvement their (women) use of FP? Some studies have reported that in some cases, males  
76 involvement in FP decisions but deter their partners from using FP methods and such negative  
77 attitude and heavy resistance of men might contribute to low utilization of FP methods in  
78 women [12, 13].

79 To strengthen male involvement in sexual and reproductive health (SRH) in Uganda,  
80 Reproductive Health Uganda (RHU) and the Ministry of Health Uganda (MHU) in partnerships  
81 with local stakeholders, have been carrying out activities that involves men as agents of change,  
82 equal partners and clients. For example, gender-focused discussions and male-only information  
83 and testing days are available to men at local clinics [2, 14]. Despite all these efforts, the  
84 prevalence of male involvement in SRH issues has remained significantly low.[15–17] Most

85 descriptive studies aimed at ascertaining male involvement in FP has involved men while  
86 women's attitudes towards male involvement has been neglected. Therefore, this study assessed  
87 the attitude of women in Nakawa Division, Kampala, Uganda regarding male involvement in  
88 FP and the associated factors.

## 89 **Subjects and Methods**

### 90 **Study Area and population**

91 The study was conducted in Nakawa division, the largest among the five administrative  
92 divisions of the city of Kampala district in Uganda bordering Kira Town to the east, Wakiso  
93 District to the north, Kawempe Division to the north-west, Kampala Central Division to the  
94 west and Makindye Division across the south. The division which is located in the eastern part  
95 of Kampala city with coordinates 0°20'00.0"N, 32°37'00.0"E. The 2019 national census  
96 estimated the division's population at 317,023, with 163,594 females and 153,429 males. The  
97 population growth rate in 2019 was 4.8 percent, the total fertility rate was 5.1 percent and the  
98 maternal mortality rate was 116 per 100,000 live births [18].

### 99 **Study design, sample size estimation and sampling**

100 This community-based cross-sectional study carried out in Nakawa Division, Kampala,  
101 Uganda from November, 2018- June 2019. The sample size for the study was calculated using  
102 the single population proportion formula and based on both partner involvement in  
103 contraceptive decision rate of 24%, from previous study conducted in Uganda [19], with a 5%  
104 margin of error and a confidence interval of 95%; given that Z (at 95% confidence interval)  
105 =1.96 and considering 15% for non-response rate, the calculated sample size including was 320.

106 However, because multi-stage sampling was used, a multiplier factor of 1.5 was considered to  
107 the sample to cater for the design effect to give a final sample of 480. Therefore, a total of 480  
108 women aged 18-49 years were recruited in this study.

109 Multistage sampling technique was employed to select study participants. Of the 23  
110 parishes in Nakawa division, eight parishes namely, Banda, Bukoto I, Butabika, Kiswa,  
111 Kiwatule, Mutungo, Naguru I and Naguru II were selected by random sampling. The sampling  
112 frame was prepared for each parish after identifying households with women aged 18-49 years  
113 through rapid registration and list development during house-house visit by the trained village  
114 health teams. The sample size was distributed to each of the selected parish proportional to their  
115 population size (women aged 18-49 years). The sampling interval was determined by dividing  
116 the total population in each parish to the size of the sample required from that parish and  
117 participants were selected using systematic random sampling. The phone numbers of  
118 consenting eligible participants were requested for further discussions.

## 119 **Study instrument and data collection**

120 A close-ended structured questionnaire was used to collect information from the  
121 participants. The questionnaire consisted of three sections namely section A: sociodemographic  
122 and economic characteristics of the participants and section B: questions designed to measure  
123 male involvement in family planning such as (a) the discussion of family planning with partner,  
124 (b) financial support for family planning from partner, (c) joint decisions with partner about  
125 contraceptive use and choice, (d) attendance to family planning clinics at least once with the  
126 past 12 months. Section C consisted of an index of six (06) questions aimed at measuring  
127 women's attitudes towards male involvement in FP & CU as favourable or unfavourable.

128           The eligible participants were contacted two weeks prior to the data collection and the  
129 purpose, risk and significance of the study was introduced to them. Participants who met the  
130 inclusion criteria were mobilized to the nearest community center for data collection for data  
131 collection. Before the questionnaires were administered, the aim and objectives were explained  
132 to participants and their consent was then sought. Participants were informed of their right to  
133 decline to partake in the study and confidentiality was assured and kept. Rapport was  
134 established and data was collected using the structured interview-administered questionnaire.  
135 The face-to face survey were conducted by trained research assistants with minimum  
136 qualification of a university diploma, who were fluent in both Luganda and English. From time  
137 to time, the participants were interacted with by repeating or clarifying questionnaire items to  
138 encourage prompt responses from the participants. The survey was estimated to take  
139 approximately 10-15 minutes to complete.

## 140   **Selection Operational Definitions**

141           To determine the overall male involvement in FP, participants were asked whether their  
142 spouse/partner performed a specific single task and scored (1) for where a task was performed  
143 and (0) for where the task was not performed. The overall score a participant could obtain  
144 ranged from 0 to 5. Therefore, a score of 3 and above indicated adequate male involvement and  
145 a score of 2 tasks and below indicated inadequate male involvement. With regards to attitude  
146 of women towards male involvement in FP, six (06) questions with dichotomous (Agree and  
147 Disagree) with answers were asked. A maximum score a participant could obtain was 6 and a  
148 minimum of 0, a participant was presumed to have a favourable attitude on male involvement  
149 in FP & CU if she scored three or more points otherwise had an unfavourable attitude.

## 150 **Ethical Consideration and informed consent**

151           This study was conducted based on the Helsinki Declaration and study protocol, consent  
152 forms and participant information material were reviewed and approved by University of  
153 Ibadan/University Collage Hospital Ethics Committee (UI/EC/18/0635). Ugandan National  
154 Council for Science and Technology approved the research and assigned a reference number  
155 (UNCST: SS 4921)

156           Written informed consent of individual participants was sought after the aims and  
157 objectives of the study had been thoroughly explained to them. Participants either signed or  
158 thumb-printed to give their consent, before the commencement of the study and they assured  
159 of the confidentiality of their data.

## 160 **Statistical Analysis**

161           After retrieving the questionnaires, each was inspected for accuracy and completeness.  
162 Data entry, and analysis was done using SPSS software (version 22). The sociodemographic  
163 and economic characteristics, male involvement and attitude of the participants were analysed  
164 and presented as frequencies, percentage, mean, standard deviations and presented  
165 appropriately using tables. Binary and multivariate logistic regression analysis was applied to  
166 explore the association between the women's attitude towards male involvement in FP and  
167 participants characteristics. A p value <0.05 was considered statistically significant.

## 168 **Results**



169 **Socio-demographic and economic characteristics of the**  
 170 **participants and their partners.**

171 Table 1 depicts the main sociodemographic characteristics of the study participants. A  
 172 total of 485 participants with mean age of 28.29±6.57 years were involved in this study;  
 173 197(41.0%) were aged 26-33 years, 399 (83.1%) were Christians, 240(50.0%) had attained  
 174 secondary school education and 239(49.8%) of their partners had attained tertiary education.  
 175 The majority of the participants and their partners were married (361,75.2% vs 431,89.8%),  
 176 lived in urban area (342,71.3%), and employed (381,79.4%). More than two-thirds of  
 177 participants and their partners worked as full time (342, (71.3%) vs 382(79.6%)). Also,  
 178 205(42.7%) of the participants earned between 120,000-500,000 UGX on average per month  
 179 and most 382(79.6%) of their partners earned 600,000 UGX and above.

180 **Table 1: Socio-demographic and economic characteristics of the participants and their**  
 181 **partners.**

| <b>Variables</b>                       | <b>Frequency (N=480)</b> | <b>Percentage (%)</b> |
|----------------------------------------|--------------------------|-----------------------|
| <b>Age of participants (yrs)</b>       | Min=18 Max=49            | Mean: 28.29±6.57      |
| 18-25                                  | 192                      | 40.0                  |
| 26-33                                  | 197                      | 41.0                  |
| 34-41                                  | 63                       | 13.1                  |
| 42-49                                  | 28                       | 5.8                   |
| <b>Religion</b>                        |                          |                       |
| Christian                              | 399                      | 83.1                  |
| Muslim                                 | 81                       | 16.9                  |
| <b>Education level of participants</b> |                          |                       |
| No formal education                    | 18                       | 3.8                   |
| Primary                                | 62                       | 12.9                  |
| Secondary                              | 240                      | 50.0                  |
| Tertiary                               | 160                      | 33.3                  |
| <b>Education level of partners</b>     |                          |                       |
| No formal education                    | 43                       | 9.0                   |

|                                                   |     |      |
|---------------------------------------------------|-----|------|
| Primary                                           | 24  | 5.0  |
| Secondary                                         | 174 | 36.3 |
| Tertiary                                          | 239 | 49.8 |
| <b>Marital status</b>                             |     |      |
| Never married                                     | 96  | 20.0 |
| Ever married                                      | 23  | 4.8  |
| Married                                           | 361 | 75.2 |
| <b>Area of residence</b>                          |     |      |
| Rural                                             | 21  | 4.4  |
| Semi-urban                                        | 117 | 24.4 |
| Urban                                             | 342 | 71.3 |
| <b>Employment status of the participants</b>      |     |      |
| Unemployed                                        | 99  | 20.6 |
| Employed                                          | 381 | 79.4 |
| <b>Employment status of partner</b>               |     |      |
| Unemployed                                        | 49  | 10.2 |
| Employed                                          | 431 | 89.8 |
| <b>Work schedule of participants</b>              |     |      |
| Unemployed                                        | 99  | 20.6 |
| Shifts schedule                                   | 7   | 1.5  |
| Part-time                                         | 32  | 6.7  |
| Full-time                                         | 342 | 71.3 |
| <b>Work schedule of partners</b>                  |     |      |
| Unemployed                                        | 49  | 10.2 |
| Shifts schedule                                   | 14  | 2.9  |
| Part-time                                         | 35  | 7.3  |
| Full-time                                         | 382 | 79.6 |
| <b>Average monthly income of the participants</b> |     |      |
| 0-100,000/=                                       | 161 | 23.5 |
| 120,000-500,000/=                                 | 205 | 42.7 |
| 600,000 and above                                 | 114 | 23.8 |
| <b>Average monthly income of partners</b>         |     |      |
| 0-100,000/=                                       | 72  | 15.0 |
| 120,000-500,000/=                                 | 176 | 36.7 |
| 600,000 and above                                 | 232 | 48.3 |

182

## 183 **Uptake of family planning services among the study participants**

184 Participants were asked whether they had used any contraceptive within previous 12  
 185 months before the commencement of this study. Among 480 participants, 465 (96.8%) had used  
 186 a family planning method twelve months before the study and 15 (3.2%) participants were found

187 not to be sexually active and not using any contraceptive or not to have used one the previous 12  
 188 months before the study. Figure 1 show that, the top five most utilized contraceptives were  
 189 injectables 151(32.5%), followed by Pills 122(26.2%), condoms 76(16.3%), Implants 37(8%)  
 190 and calendar method 30(6.5%) (Fig. 1).

191 **Fig. 1: Levels of uptake of family planning services among women aged 18-49 years in**  
 192 **Nakawa division, Kampala district, Uganda. (n=465)**

### 193 **Health facility-related characteristics of participants**

194 Among the 465/480 (96.9%) participants who were using a family planning method at  
 195 the time of the study, more than half 266(57.2%) used public means of transport to the health  
 196 facility to obtain their choice FP service, just over a third 173(37.2%) walked to the facility.  
 197 Also, more than two-third 333(71.6%) reported living within less than five kilometres of a  
 198 health facility. The majority reported a waiting time of less than an hour at the facility alone  
 199 (384, 82.6%) or with partner (452, 97.2%). Almost all participants 429(92.3%) reported that  
 200 the FP clinic environment is male friendly and that the behaviour of staff at the health facility  
 201 was friendly 383(82.4%) (Table 2).

202 **Table 2: Distribution of health facility-related characteristics of women aged 18-49 years**  
 203 **in Nakawa division, Kampala district, Uganda**

| <b>Variables</b>                                              | <b>Frequency (N=450)</b> | <b>Percentage (%)</b> |
|---------------------------------------------------------------|--------------------------|-----------------------|
| <b>Transport to the health facility to obtain FP services</b> |                          |                       |
| By foot                                                       | 173                      | 37.2                  |
| Personal means                                                | 26                       | 5.6                   |
| Public means                                                  | 266                      | 57.2                  |
| <b>Proximity to a health facility</b>                         |                          |                       |
| >5km                                                          | 333                      | 71.6                  |
| ≥5km                                                          | 132                      | 28.4                  |
| <b>Waiting time at the health facility alone</b>              |                          |                       |

|                                                         |     |      |
|---------------------------------------------------------|-----|------|
| >1hr                                                    | 384 | 82.6 |
| ≥1hr                                                    | 81  | 17.4 |
| <b>Waiting time at the health facility with partner</b> |     |      |
| >1hr                                                    | 452 | 97.2 |
| ≥1hr                                                    | 13  | 2.8  |
| <b>Rating for waiting time</b>                          |     |      |
| Short                                                   | 38  | 8.2  |
| Normal                                                  | 339 | 72.9 |
| Long                                                    | 88  | 18.9 |
| <b>The FP clinic environment is welcoming for men</b>   |     |      |
| No                                                      | 36  | 7.7  |
| Yes                                                     | 429 | 92.3 |
| <b>The behaviour of staff at the health facility</b>    |     |      |
| Unfriendly                                              | 82  | 17.6 |
| Friendly                                                | 383 | 82.4 |

204

205 **Male partner involvement in family planning use among the study**  
 206 **participants.**

207 Table 3 summarizes the participants recall of their partners involvement in their  
 208 previous FP or CU. A total of 274/465(58.9%) of the women discussed FP and CU with their  
 209 partners, 342/465 (53.5%) received financial support from their partners and 251/465 (54.0%)  
 210 makes joint decisions with the partner about contraceptive use and choice. In the past 12 months,  
 211 less than one-third (106/465,22.8%) of the women had their partners accompany them FP clinic  
 212 at least once and 329/465 (70.8%) of the participants stated that their partners were aware of their  
 213 contraceptive use within the past 12 months. In totality, 302/465(62.9%) of the women had  
 214 adequate partner involvement in their family planning and contraceptive use while  
 215 163/465(34.0%) had inadequate partner involvement.

216 **Table 3: Distribution of male partner involvement in family planning and Contraceptive**  
 217 **Use in women aged 18-49 years in Nakawa Division, Kampala District.**

| Variables                                                                        | Frequency(N=465) | Percentage (%) |
|----------------------------------------------------------------------------------|------------------|----------------|
| <b>Discusses with the partner about FP &amp; CU</b>                              |                  |                |
| No                                                                               | 191              | 41.1           |
| Yes                                                                              | 274              | 58.9           |
| <b>Partner offers financial support</b>                                          |                  |                |
| No                                                                               | 123              | 26.5           |
| Yes                                                                              | 342              | 73.5           |
| <b>Makes joint decisions with the partner about contraceptive use and choice</b> |                  |                |
| No                                                                               | 214              | 46.0           |
| Yes                                                                              | 251              | 54.0           |
| <b>Partner attended FP clinic at least once in the past 12 months (n=465)</b>    |                  |                |
| No                                                                               | 359              | 77.2           |
| Yes                                                                              | 106              | 22.8           |
| <b>Partner is aware of my previous contraceptive use (in the past 12 months)</b> |                  |                |
| No                                                                               | 136              | 29.2           |
| Yes                                                                              | 329              | 70.8           |
| <b>Overall male involvement</b>                                                  |                  |                |
| Inadequate                                                                       | 163              | 34.0           |
| Adequate                                                                         | 302              | 62.9           |

218

219 **Women’s attitude towards male involvement in family planning.**

220 Table 4 summary depicts that more than three-quarters of participants agreed that it is  
221 okay; to discuss FP & CU with a partner 387/480 (80.6%), to attend FP clinics with a partner  
222 380/480 (79.2%), that family and friends do not mind if they discussed FP & CU with a spouse  
223 410/480 (85.4%), men have a role to play in FP & CU use 449/480 (93.5%) and to discuss FP &  
224 CU with a partner motivates utilization of the services 427/480 (89.0%). However, less than half  
225 239/480 (49.8%) agreed that their partner would be comfortable attending family planning  
226 sessions with them. A total of 438/480 (91.3%) of the participants had favourable attitude of  
227 women toward male involvement in FP while only 42/480 (8.8%) had unfavourable attitude of  
228 women toward male involvement in FP.

229 **Table 1: Distribution of women’s attitude toward male involvement in family planning.**

| Variable                                                                      | Characteristic | Frequency (N=480) | Percentage (%) |
|-------------------------------------------------------------------------------|----------------|-------------------|----------------|
| It is okay to discuss family planning and contraceptive use with your partner | Agree          | 387               | 80.6           |
|                                                                               | Disagree       | 93                | 19.4           |
| It is okay for you to attend Family planning clinics with your partner        | Agree          | 380               | 79.2           |
|                                                                               | Disagree       | 100               | 20.8           |
| Family and friends do not mind if you discuss FP and CU with your spouse      | Agree          | 410               | 85.4           |
|                                                                               | Disagree       | 70                | 14.6           |
| Men have a role to play in family planning and contraceptive use              | Agree          | 449               | 93.5           |
|                                                                               | Disagree       | 31                | 6.5            |
| Discussing FP & CU with your partner motivates utilization of the services    | Agree          | 427               | 89.0           |
|                                                                               | Disagree       | 53                | 11.0           |
| Your partner will be comfortable attending family planning sessions with you  | Agree          | 239               | 49.8           |
|                                                                               | Disagree       | 241               | 50.2           |
|                                                                               |                |                   |                |
| <b>Overall attitude</b>                                                       |                |                   |                |
| Unfavourable                                                                  |                | 42                | 8.8            |
| Favourable                                                                    |                | 438               | 91.3           |

230

231 **Analysis of predictors of favorable attitude of women toward male**  
 232 **involvement in FP.**

233 Exactly 9 independent variables were entered into the bivariate and the multivariate  
 234 logistic regression, the unadjusted regression analysis showed that level of education of  
 235 participants, average monthly income of participants, average monthly income of partners,  
 236 waiting time rating, male friendly FP clinic environment, the behaviour of staff at the health  
 237 facility and male involvement were predictors of favourable attitude towards male involvement  
 238 in FP. After adjusting for confounders in the multivariate analysis, only average monthly income

239 of participants and male involvement were predictors of favourable attitude towards male  
240 involvement in FP.

241           The unadjusted regression analysis showed that, women who had attained tertiary  
242 education had greater odds of showing favourable attitude towards male involvement in FP  
243 compared to their counterparts who had no formal education (COR=8.85, 95% CI {2.13–36.79},  
244 p=0.003). Participants with an average monthly income of 120,000-500,000/= (COR=1.94, 95%  
245 CI {1.00–3.75}, p=0.049) and having an average monthly income of 600,000/= and above  
246 (COR=19.8, 95% CI {2.6–148.60}, p=0.004) were more likely to have favourable attitude  
247 towards male involvement in FP compared with those earning 0-100,000/= average monthly  
248 income per month. Also, participants whose partners earned an average monthly income of  
249 600,000/= per month had greater likelihood of having favourable attitude towards male  
250 involvement in FP (COR=2.87, 95% CI {1.14–7.23}, p=0.025). A statistically significant  
251 predictive relationship was found between favourable attitude towards male involvement in FP  
252 and women who agreed that the FP clinic environment is welcoming for men (COR=3.94, 95%  
253 CI {1.65–9.42}, p=0.002). Participants who agreed that the behaviour of staff at the health facility  
254 was friendly were less likely to have favourable attitude towards male involvement in FP (COR=  
255 0.12, 95% CI {0.02–0.88}, p=0.037). Women who had adequate male partner involvement had  
256 higher likelihood of having favourable attitude of toward male involvement in FP (COR=3.84,  
257 95% CI {1.90–7.77}, p<0.001) relative to those with inadequate male partner involvement.

258           After adjusting for confounders, participants with an average monthly income of  
259 600,000/= and above were more likely to have favourable attitude towards male involvement in  
260 FP (AOR=10.51, 95% CI {1.19–93.25}, p=0.035) compared with those earning 0-100,000/=  
261 average monthly income per month. Also, participants with adequate male partner involvement

262 in FP/CU use were more likely to have favourable attitude towards male involvement in FP  
 263 (AOR=2.78, 95% CI {1.23–6.30, p<0.014) (Table 5).

264 **Table 5: Bivariate analysis of predictors of adequate male involvement in family planning**  
 265 **among women aged 18-49 years in Nakawa Division, Kampala District, Uganda**

| Variables                                             | Attitude     |            | COR 95% CI       | P-value      | AOR 95% CI        | P-value       |
|-------------------------------------------------------|--------------|------------|------------------|--------------|-------------------|---------------|
|                                                       | Unfavourable | Favourable |                  |              |                   |               |
|                                                       | N (%)        | N (%)      |                  |              |                   |               |
| <b>Women's level of education</b>                     |              |            |                  |              |                   |               |
| No formal education                                   | 4(9.5)       | 14(3.3)    | 1                |              | 1                 |               |
| Primary                                               | 11(26.2)     | 51(11.6)   | 1.33[0.37–4.80]  | 0.669        | 0.69[0.16–2.93]   | 0.615         |
| Secondary                                             | 22(52.4)     | 218(49.8)  | 2.83[0.86–9.35]  | 0.088        | 1.33[0.34–5.17]   | 0.683         |
| Tertiary                                              | 5(11.9)      | 155(35.4)  | 8.85[2.13–36.79] | <b>0.003</b> | 4.52[0.60–34.05]  | 0.144         |
| <b>Partners' level of education</b>                   |              |            |                  |              |                   |               |
| No formal education                                   | 5(11.9)      | 38(8.7)    | 1                |              | 1                 |               |
| Primary                                               | 7(16.7)      | 17(5.0)    | 0.32[0.09–1.15]  | 0.081        | 0.36[0.07–1.86]   | 1.859         |
| Secondary                                             | 18(42.9)     | 156(35.6)  | 1.14[0.40–3.27]  | 0.807        | 1.16[0.29–4.67]   | 4.666         |
| Tertiary                                              | 12(28.6)     | 227(51.8)  | 2.49[0.83–7.47]  | 0.104        | 1.18[0.26–5.28]   | 5.277         |
| <b>Area of residence</b>                              |              |            |                  |              |                   |               |
| Rural                                                 | 1(2.4)       | 20(4.6)    | 1                |              | 1                 |               |
| Semi-urban                                            | 20(47.6)     | 97(22.1)   | 0.24[0.03–1.91]  | 0.179        | 0.25[0.03–2.47]   | 0.235         |
| Urban                                                 | 21(50.0)     | 321(73.3)  | 0.80[0.10–5.97]  | 0.798        | 0.44[0.05–4.19]   | 0.475         |
| <b>Average monthly income of the participants</b>     |              |            |                  |              |                   |               |
| 0-100,000/=                                           | 24(57.1)     | 135(31.3)  | 1                |              | 1                 |               |
| 120,000-500,000/=                                     | 17(40.5)     | 188(42.9)  | 1.94[1.00–3.75]  | <b>0.049</b> | 1.60[0.69–3.72]   | 0.277         |
| 600,000 and above                                     | 1(2.4)       | 113(25.8)  | 19.8[2.6–148.60] | <b>0.004</b> | 10.51[1.19–93.25] | <b>0.035*</b> |
| <b>Average monthly income of partners</b>             |              |            |                  |              |                   |               |
| 0-100,000/=                                           | 9(21.4)      | 63(14.4)   | 1                |              | 1                 |               |
| 120,000-500,000/=                                     | 22(52.4)     | 154(35.2)  | 1[0.44–2.91]     | 1.000        | 1.00[0.32–3.06]   | 0.983         |
| 600,000 and above                                     | 11(26.2)     | 221(50.5)  | 2.87[1.14–7.23]  | <b>0.025</b> | 1.20[0.32–4.44]   | 0.790         |
| <b>Rating for waiting time</b>                        |              |            |                  |              |                   |               |
| Short                                                 | 6(16.2)      | 32(7.5)    | 1                |              | 1                 |               |
| Normal                                                | 25(67.6)     | 314(73.4)  | 2.36[0.9–6.17]   | 0.081        | 2.27[0.72–7.20]   | 0.164         |
| Long                                                  | 6(16.2)      | 82(19.2)   | 2.56[0.77–8.53]  | 0.125        | 1.93[0.49–7.70]   | 0.349         |
| <b>The FP clinic environment is welcoming for men</b> |              |            |                  |              |                   |               |



|                                                      |          |           |                 |                  |                 |               |
|------------------------------------------------------|----------|-----------|-----------------|------------------|-----------------|---------------|
| No                                                   | 8(21.6)  | 28(6.5)   | 1               |                  | 1               |               |
| Yes                                                  | 29(78.4) | 400(93.5) | 3.94[1.65–9.42] | <b>0.002</b>     | 2.40[0.85–6.78] | 0.098         |
| <b>The behaviour of staff at the health facility</b> |          |           |                 |                  |                 |               |
| Unfriendly                                           | 1(2.7)   | 81(18.9)  | 1               |                  | 1               |               |
| Friendly                                             | 36(97.3) | 347(81.1) | 0.12[0.02–0.88] | <b>0.037</b>     | 0.16[0.02–1.22] | 0.076         |
| <b>Male involvement</b>                              |          |           |                 |                  |                 |               |
| Inadequate                                           | 24(64.9) | 139(32.5) | 1               |                  | 1               |               |
| Adequate                                             | 13(35.1) | 289(67.5) | 3.84[1.90–7.77] | <b>&lt;0.001</b> | 2.78[1.23–6.30] | <b>0.014*</b> |

266

## 267 Discussion

268 Our study assessed the attitudes of women towards male involvement in FP and the  
 269 associated factors. The mean age of the participants was 28.29±6.57 years, signifying a youthful  
 270 population and a reflection of Ugandan’s rural and urban women’s age structure where most  
 271 are in their second and third decades of life [20]. This stresses a need to control fertility rates  
 272 through the promotion of FP services among the population. Consistent with the findings of  
 273 Andi et al. [5] most of the participants were Christians and with secondary education. These  
 274 findings are important for public health interventions planning. Leaders of the Christian religion  
 275 could be considered as key stakeholders in the planning and promotion of FP services in  
 276 Nakawa Division, and across the country. They can use their platforms to promote the use of  
 277 FP among the population. It is equally important to recognize other minority religious groups  
 278 in addressing FP in Uganda since studies elsewhere have described the role of religion in the  
 279 promotion of contraceptive use [21, 22].

280 According to the Ugandan Demographic and Health Survey (UDHS) [20] persons with  
 281 secondary education are considered literates. Therefore, having majority of the current study’s  
 282 participants and other studies [5, 23, 24] with secondary and postsecondary education is  
 283 important for increased health literacy on FP. Considering the significant number persons who

284 enrolled to the secondary level of education, it is important to strengthen the effectiveness of  
285 the implementation of the Ugandan School Health Policy[25], with much emphasis on FP  
286 services and importance. Majority of the participants were married, highlighting the need to  
287 consider partners in FP interventions [26]. The study observed that most of the participants  
288 were urban dwellers and was inconsistent with the finding of Andi et al. [5]. Suggestively,  
289 interventions on FP should be targeted among both urban and rural areas of the country. For  
290 example, the UDHS [20] reported that women in the urban areas are more literate than women  
291 in rural areas of Uganda. Therefore, public health education on FP should be targeted across  
292 the country with more concentration at the rural areas.

293 Contraceptive uptake was significant among participants in our study. Contraceptive  
294 uptake in Uganda is universal [23, 24, 27]. For example, Otim [24] reported varying but  
295 significant proportions of contraceptive use among Ugandan women with the Central, Eastern,  
296 Northern and Western parts of the country recording 65%, 57%, 45% and 56% contraceptive  
297 use respectively. Though there is universal uptake of contraceptives in our study setting and  
298 across the country, persons who do not use available contraceptives equally form important  
299 section of Uganda's population. Such persons should be targeted for FP services and  
300 interventions to address the unmet needs of FP in the country. Consistent with previous studies  
301 in Uganda [19, 28, 29] the commonly utilized contraceptives comprised injectables, pills,  
302 condoms, implants and calendar methods.

303 To access available FP services, most of the participants used public means of transport  
304 with majority dwelling in catchment areas of FP. Turnaround time for FP services was less than  
305 an hour for most users of FP and more importantly male friendly. Though most of the  
306 participants reside in the catchment area for FP services, there is a need to make FP more

307 accessible to the 28.4% who are distant from FP service centres. A previous study in Uganda  
308 reported some barriers to FP services use to comprised long distance to health facility and  
309 husbands been unfriendly towards the use of FP [30, 31]. The apparently short distance and  
310 male friendly FP service environment in our study suggests an improvement in accessibility to  
311 FP services in the study. Most of our participants self-reported adequate involvement of their  
312 male partners in their patronage of FP services and consistent with studies elsewhere [32, 33].  
313 In the African traditional setting, males play important role in the decision-making and the  
314 health seeking behaviours of the family [33].

315 Our study participants indicated that their partners' involvement in their FP usage  
316 comprised having discussions on FP choices, financial support, and accompaniment to FP  
317 service centres. Therefore, to scale-up FP services uptake in Uganda, males should be targeted  
318 for public health educational and promotional activities to increase their appreciation of FP  
319 services. The male's partner appreciation of FP services could go a long way to encourage  
320 female patronage of FP services. Mulatu et al. [34] reported that male's involvement in  
321 discussions on FP, sexual and reproductive health, and approval from husbands on the use of  
322 FP were positive factors for FP use.

323 On participants' attitudes towards male involvement in FP services, our study showed  
324 that most of the women had favourable attitudes towards males' involvement in FP services.  
325 Another important assertion made by participants was feeling comfortable to discuss FP  
326 services with their male partners. Previous studies have extensively explored the importance of  
327 spousal communication and its' effect on the use of FP services including contraceptives [33,  
328 35]. Zelalem et al. [35] reported that effective spousal FP communication was significantly  
329 associated with current modern contraceptive use.

330 Key predictors for favourable attitude towards male involvement in FP after adjusting  
331 for confounders in the multivariate analysis included average monthly income of participants  
332 and male involvement of FP. Our finding of average income as a positive predictor for FP  
333 attitude was consistent with Serwanja et al. [28] report of being in the middle wealth quintile  
334 as a positive factor for contraception. Similarly, Our finding of male involvement as a positive  
335 factor for favourable attitude towards male involvement in FP was inconsistent with Asif et al.  
336 [36] finding of women with partners who discourage usage of contraception. Though there exist  
337 variations in the predictors for FP services for male involvement, which is a common  
338 phenomenon in research due to factors including variations in sample sizes and study context.

339 Our results indicate that income and male involvement in FP services were important  
340 factors to determine female attitudes towards FP services. Income has been reported by previous  
341 studies and reports as a the most important social determinant of health. An individual's level  
342 of income influences the general living conditions, including the health-related behaviours [37,  
343 38]. Our study may suggest that males that show financial support to their spouses are likely to  
344 afford FP planning services. Again, the finding highlight the need for the Ugandan government  
345 to address the poverty gap for improved health seeking behaviours including uptake of FP  
346 services.

347 This study was without limitations. First, the study was self-reported and may be  
348 subjected to information bias. Second, the study reports on males' involvement on family  
349 planning from the females and may not be reflection of male involvement in family planning  
350 services. The study is also limited to the Nakawa Division, Kampala, and may not reflect the  
351 population of Uganda. Therefore, the use of the study for decision making purposes on family  
352 planning should be done with caution and contextualized.

## 353 **Conclusion**

354 Family planning uptake was high among participants and their male partners. Common  
355 utilized contraceptives were injectables, pills, condoms, Implants and calendar method. The  
356 overall attitudes of women towards partner involvement in their family planning and  
357 contraceptive use was adequate. Average monthly income and participants with adequate male  
358 partner involvement in family planning use were more likely to have favorable attitude towards  
359 male involvement in FP. The study shows the need to involve males in family planning  
360 programmes for increased service uptake.

## 361 **Acknowledgements**

362 Our deepest gratitude goes to Pan African University, University of Ibadan, Ugandan  
363 National Council for Science and Technology, The District Health Office of Nakawa Division  
364 and Kampala Capital City Authority for facilitating this study. Finally, our special respect goes  
365 to all respondents and data collectors in this study.

## 366 **Competing Interests**

367 All authors declare that there is no competing interest.

## 368 **Authors' Contributions**

369 SNW made substantial contributions to conception, design, acquisition of data and  
370 assisted by AB and OOO. Data analysis and interpretation was done by AR, DS and EKD.

371 SNW, EP, MWK and OOO wrote the first draft of the manuscript. All authors critically  
372 reviewed, revised and approved the final manuscript

## 373 **References**

- 374 [1] UDHS. Uganda Bureau of Statistics - UBOS, ICF. Uganda Demographic and Health  
375 Survey, chrome-  
376 [extension://efaidnbmnnnibpcajpcglclefindmkaj/https://dhsprogram.com/pubs/pdf/FR333](https://dhsprogram.com/pubs/pdf/FR333/FR333.pdf)  
377 [3/FR333.pdf](https://dhsprogram.com/pubs/pdf/FR333/FR333.pdf) (2016).
- 378 [2] MOH. Government of Uganda, Ministry of Health. Health Sector Development Plan  
379 2015/16 - 2019/20.
- 380 [3] Nalwadda G, Mirembe F, Byamugisha J, et al. Persistent high fertility in Uganda: young  
381 people recount obstacles and enabling factors to use of contraceptives. *BMC Public*  
382 *Health* 2010; 10: 1–13.
- 383 [4] Bbaale E, Mpuga P. Female education, contraceptive use, and fertility: evidence from  
384 Uganda. *Consilience* 2011; 20–47.
- 385 [5] Andi JR, Wamala R, Ocaya B, et al. Modern contraceptive use among women in Uganda:  
386 An analysis of trend and patterns (1995-2011). *Etude la Popul africaine= African Popul*  
387 *Stud* 2014; 28: 1009.
- 388 [6] Musoke D, Ekirapa-Kiracho E, Ndejjo R, et al. Using photovoice to examine community  
389 level barriers affecting maternal health in rural Wakiso district, Uganda. *Reprod Health*  
390 *Matters* 2015; 23: 136–147.
- 391 [7] Kampala JBA. Socio-demographic factors associated with contraceptive use among  
392 young women in comparison with older women in Uganda.
- 393 [8] Grady WR, Tanfer K, Billy JOG, et al. Men’s perceptions of their roles and  
394 responsibilities regarding sex, contraception and childrearing. *Fam Plann Perspect* 1996;  
395 221–226.
- 396 [9] Onyango MA, Owoko S, Oguttu M. Factors that influence male involvement in sexual  
397 and reproductive health in western Kenya: a qualitative study. *Afr J Reprod Health*; 14.
- 398 [10] Assefa L, Shasho Z, Kasaye HK, et al. Men’s involvement in family planning service

- 399 utilization among married men in Kondala district, western Ethiopia: a community-based  
400 comparative cross-sectional study. *Contracept Reprod Med* 2021; 6: 1–16.
- 401 [11] Tamiso A, Admasu T, Henok B, et al. Barriers to male involvement in family planning  
402 services in Arba Minch town, southern Ethiopia: qualitative case study. *Int J Public Heal*  
403 *Serv* 2016; 5: 46–50.
- 404 [12] Girum T, Shegaze M, Tariku Y. The role of currently married men in family planning  
405 and its associated factors in Agaro Town, South West Ethiopia. *Ann Med Health Sci Res*;  
406 7.
- 407 [13] Akindele RA, Adebimpe WO. Encouraging male involvement in sexual and  
408 reproductive health: family planning service providers’ perspectives. *Int J Reprod*  
409 *Contraception, Obstet Gynecol* 2013; 2: 119–124.
- 410 [14] Pascoe L, Herstad M, Shand T, et al. Building male involvement in SRHR: A basic  
411 model for male involvement in sexual and reproductive health and rights. *Cape T Sonke*  
412 *Gend Justice Netw*.
- 413 [15] Kaida A, Kipp W, Hessel P, et al. Male participation in family planning: results from a  
414 qualitative study in Mpigi District, Uganda. *J Biosoc Sci* 2005; 37: 269–286.
- 415 [16] Muhindo R, Okonya JN, Groves S, et al. Predictors of contraceptive adherence among  
416 women seeking family planning services at Reproductive Health Uganda, Mityana  
417 Branch. *Int J Popul Res*; 2015.
- 418 [17] Kabagenyi A, Reid A, Ntozi J, et al. Socio-cultural inhibitors to use of modern  
419 contraceptive techniques in rural Uganda: a qualitative study. *Pan Afr Med J*; 25.
- 420 [18] KCCA. STATISTICAL ABSTRACT FOR KAMPALA CITY 2019 Report prepared  
421 with support from Uganda Bureau of Statistics, chrome-  
422 extension://efaidnbmnnnibpcajpcglclefindmkaj/https://www.kcca.go.ug/media/docs/Statistical-Abstract-2019.pdf (2019).
- 423
- 424 [19] Dougherty A, Kayongo A, Deans S, et al. Knowledge and use of family planning among  
425 men in rural Uganda 11 Medical and Health Sciences 1117 Public Health and Health  
426 Services. *BMC Public Health* 2018; 18: 1–5.
- 427 [20] UBOS. Uganda Demographic and Health Survey 2016. *Udhs* 2016; 625.
- 428 [21] Abdul-wahab I, Nungbaso AM, Nukpezah RN, et al. Adolescents Sexual and  
429 Reproductive Health : A Survey of Knowledge , Attitudes and Practices in the Tamale

- 430 Metropolis , Ghana. 2021; 6: 31–47.
- 431 [22] Dzordzormenyoh MK. Region, Religion, Education and Contraceptives Use in Ghana:  
432 An Analysis from a Gender Perspective. *SSRN Electron J* 2013; 1–37.
- 433 [23] Wamala R, Kabagenyi A, Kasasa S. Predictors of Time-to-Contraceptive Use from  
434 Resumption of Sexual Intercourse after Birth among Women in Uganda. *Int J Popul Res*  
435 2017; 2017: 1–12.
- 436 [24] Otim J. Contraceptive nonuse among women in Uganda: a comparative assessment of  
437 predictors across regions. *BMC Womens Health* 2020; 20: 1–14.
- 438 [25] Uganda School Health. *Uganda School Health*. Epub ahead of print 2014. DOI:  
439 10.1596/24472.
- 440 [26] Salway S. How Attitudes Toward Family Planning and Discussion Between Wives and  
441 Husbands Affect Contraceptive Use in Ghana. *Int Fam Plan Perspect* 1994; 20: 44.
- 442 [27] Namasivayam A, Lovell S, Namutamba S, et al. Improved contraceptive use among  
443 women and men in Uganda between 1995-2016: A repeated cross-sectional population  
444 study. *PLoS One* 2019; 14: 1–16.
- 445 [28] Sserwanja Q, Musaba MW, Mukunya D. Prevalence and factors associated with modern  
446 contraceptives utilization among female adolescents in Uganda. *BMC Womens Health*  
447 2021; 21: 1–7.
- 448 [29] Daisy BJ, Tumukunde P, Nekaka R, et al. Contraceptive uptake in Eastern Uganda was  
449 the 2020 target of 50 modern contraceptive rate achieved. *Prim Heal Care Open Access*  
450 2021; 11: 1–12.
- 451 [30] Khan S, Bradley SEK, Fishel J, et al. Unmet need and the demand for family planning  
452 in Uganda: Further analysis of the Uganda Demographic and Health Surveys, 1995-2006  
453 . *DHS Furth Anal Reports No 60* 2008; 1995–2006.
- 454 [31] Sileo KM, Wanyenze RK, Lule H, et al. Determinants of family planning service uptake  
455 and use of contraceptives among postpartum women in rural Uganda. *Int J Public Health*  
456 2015; 60: 987–997.
- 457 [32] Wondim G, Degu G, Teka Y, et al. Male Involvement in Family Planning Utilization  
458 and Associated Factors in Womberma District, Northern Ethiopia: Community-Based  
459 Cross-Sectional Study. *Open Access J Contracept* 2020; Volume 11: 197–207.
- 460 [33] Adelekan A, Omoregie P, Edoni E. Male involvement in family planning: challenges



- 461 and way forward. *Int J Popul Res*; 2014.
- 462 [34] Mulatu T, Sintayehu Y, Dessie Y, et al. Male involvement in family planning use and  
463 associated factors among currently married men in rural Eastern Ethiopia. *SAGE Open*  
464 *Med* 2022; 10: 205031212210941.
- 465 [35] Zelalem D, Worku A, Alemayehu T, et al. Association of Effective Spousal Family  
466 Planning Communication with Couples' Modern Contraceptive Use in Harar, Eastern  
467 Ethiopia. *Open Access J Contracept* 2021; Volume 12: 45–62.
- 468 [36] Asif MF, Pervaiz Z, Afridi JR, et al. Role of husband's attitude towards the usage of  
469 contraceptives for unmet need of family planning among married women of reproductive  
470 age in Pakistan. *BMC Womens Health* 2021; 21: 1–7.
- 471 [37] Mikkonen J, Raphael D. Social Determinants of Health: A Quick Guide for Health  
472 Professionals. *York Univ Sch Heal Policy Manag* 2013; 1–10.
- 473 [38] Präg P, Mills M, Wittek R. Income and income inequality as social determinants of  
474 health: Do social comparisons play a role? *Eur Sociol Rev* 2014; 30: 218–229.
- 475

medRxiv preprint doi: <https://doi.org/10.1101/2022.07.14.22277630>; this version posted July 16, 2022. The copyright holder for this preprint (which was not certified by peer review) is the author/funder, who has granted medRxiv a license to display the preprint in perpetuity. It is made available under a CC-BY 4.0 International license.

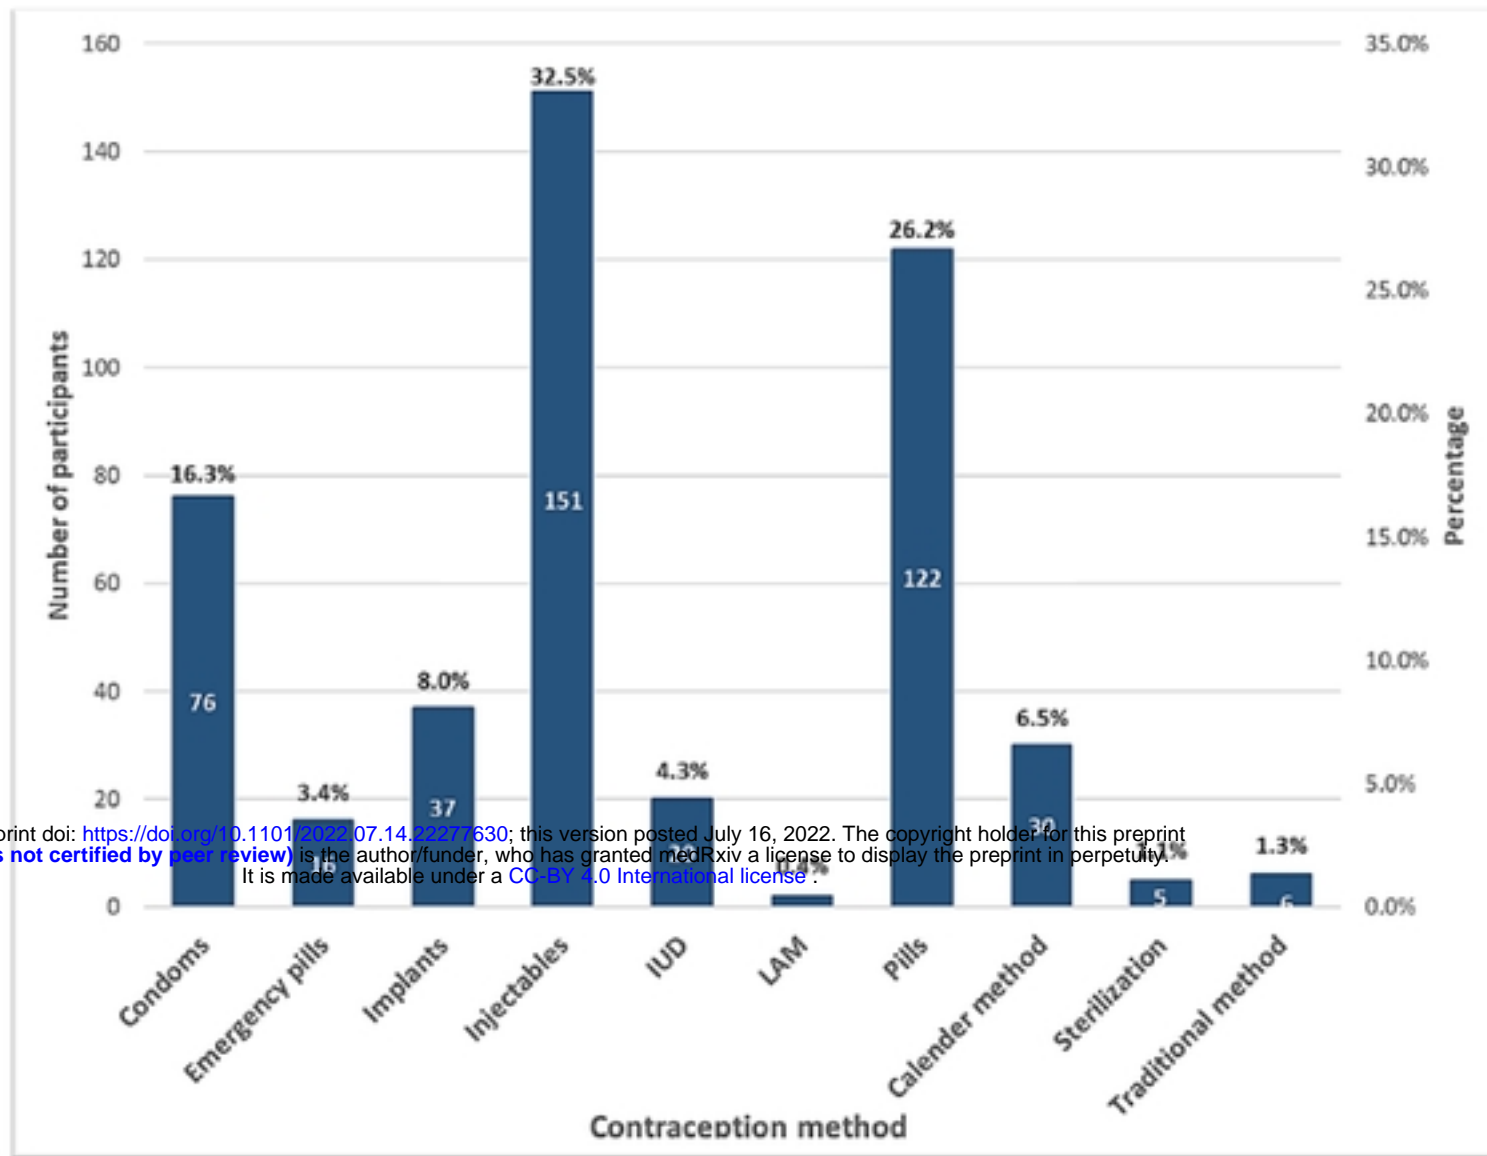

Source: https://medrxiv.org/content/10.1101/2022.07.14.22277630v1.full.pdf
